# Supplementary material
Source: publisher figshare collection journal article supplement (https://tandf.figshare.com/ndownloader/files/22123962)
Supplement: Supplementary file 1 [file 22123962]

**Supplementary table A.1**. **Area under the curve for test methods on 1.5T and 3T MRI**

|  | 1.5T (n=72)  AUC (95% CI) | 3T (n= 52)  AUC (95% CI) |
| --- | --- | --- |
| Original Gentry classification | 0.58 (0.45-0.71) | 0.70 (0.55-0.84) |
| Total number of TAI lesions | 0.68 (0.56-0.80) | 0.69 (0.55-0.84) |
| Corpus callosum single or multiple lesions | 0.58 (0.44-0.71) | 0.75 (0.61-0.89) |
| Gentry revised 1 | 0.58 (0.45-0.72) | 0.76 (0.63-0.90) |
| Gentry revised 2 | 0.64 (0.51-0.77) | 0.68 (0.53-0.82) |
| Gentry revised 3 | 0.62 (0.49-0.75) | 0.70 (0.55-0.84) |
| 6-location | 0.70 (0.57-0.82) | 0.75 (0.61-0.88) |

Legend: The reference test and the methods for grading traumatic axonal injury (TAI) with a higher area under the curve in comparison to the reference tests were applied on a 1.5T MRI (n=72) or 3T (n=52) MRI. The outcome prediction for several methods was compared between both MR field strengths. The area under the curve (AUC) was higher for all methods on the 3T MRI, however there was no statistical significant difference.
